# Supplementary material
Source: PubMed Central journal article supplement (PMC5903267)
Supplement: mic-162-2005-s001.pdf [file mic-162-2005-s001.pdf]

A

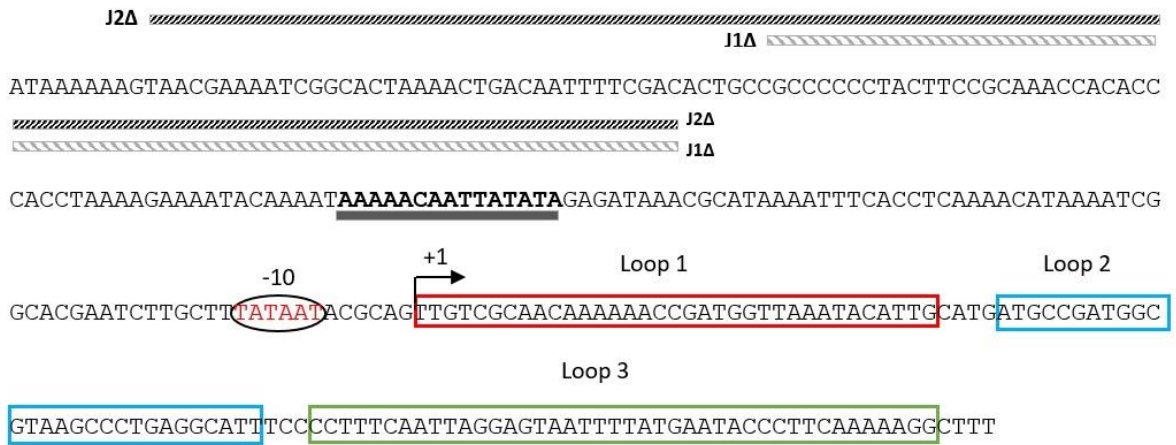

Supplemental Fig. 1

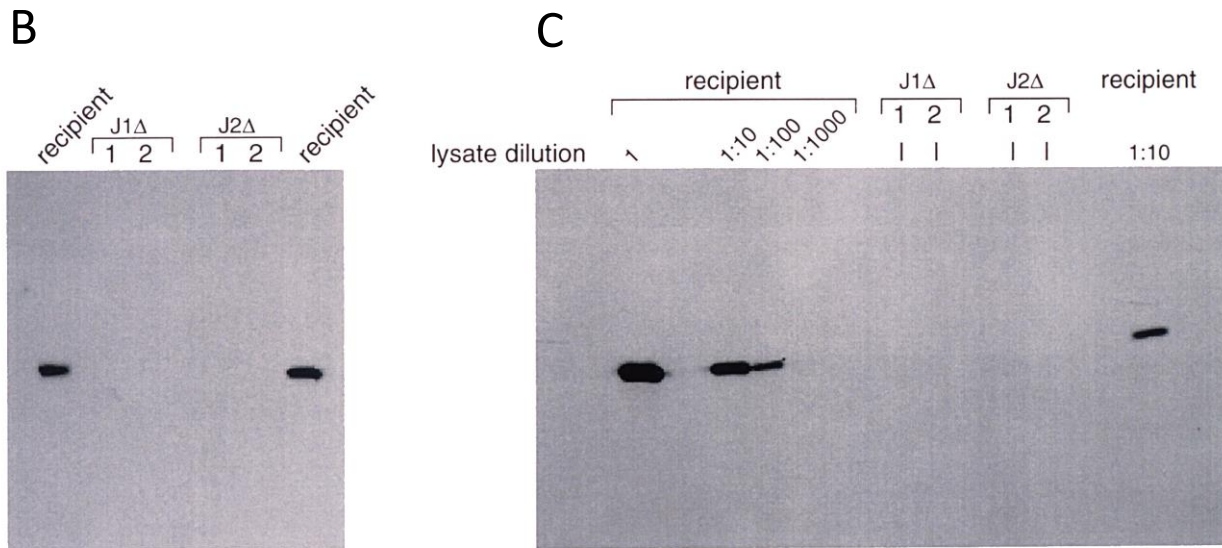

**Supplemental data Fig. 1** Western blot analysis of PilE polypeptide

Panel (a) schematically represents the *pilE* promoter region. Gonococcal J1Δ and J2Δ constructs contain deletions of IHF binding site region (the shaded horizontal bars above the nucleotide sequence). The consensus IHF binding site sequence is in bold type and underlined by the solid black bar. Loop sequences are boxed and the -10 promoter element is circled.

Panel (b) PilE polypeptide production was assessed in the two gonococcal mutants (J1 Δ and J2Δ) where the *pilE* IHF-binding site were deleted (Hill *et al.*, 1997). Monoclonal Ab Mc02 was used to probe the blot. SDS-Page lysates containing 50 μg of protein were applied to each J1 Δ and J2Δ lane. Recipient designates wild-type *N. gonorrhoeae* strain MS11 where lysates containing 5 μg of protein were applied. Panel (c) sensitivity of the western blotting protocol. Serial dilutions of the SDS Page lysate were assessed from 50 μg (designated 1) to 0.05 μg (designated 1:1000). Signal can be detected in lysates with a protein concentration of 0.5 μg (1:100 dilution).
